# Supplementary material
Source: publisher figshare collection journal article supplement (https://tandf.figshare.com/ndownloader/files/16435571)
Supplement: Supplementary file 1 [file 16435571]

***Supporting Information for:***

**Highly Specific Colon-Targeted Transformable Capsules Containing Indomethacin Immediate-Release Pellets for Colon Cancers Therapy**

*Chen Yang a, Yu Zhang a, Peng Cai b, Shirui Yuan a, Qiaofang Ma a, Ya Song a, Haobo Wei a, Ziheng Wu c, Zhenghong Wu a,* and Xiaole Qi a,**

aKey Laboratory of Modern Chinese Medicines, China Pharmaceutical University, Nanjing 210009, PR China

bDepartment of General Surgery, Xuzhou City Hospital of Traditional Chinese Medicine, Xuzhou 221000, PR China

cParkville campus, Monash University, VIC 3052, Australia.

*Correspondence: Zhenghong Wu; Xiaole Qi

Corresponding author at: Key Laboratory of Modern Chinese Medicines, China Pharmaceutical University, Nanjing 210009, PR China

Tel: +0086-15062208341

Fax:+0086-025-83179703

Email address: [zhenghongwu66@cpu.edu.cn](mailto:zhenghongwu66@cpu.edu.cn) (Z. H. Wu); [qixiaole523@163.com](mailto:qixiaole523@163.com) (X. L. Qi)

**Table S1** Factors and levels in the Box-Behnken design.

| Levels | Factors | | |
| --- | --- | --- | --- |
| X1 | X2 | X3 |
| the viscosity of the HPMC  (mPa·s) | the proportion of guar gum /lactose/HPMC | the weight of  plug tablet(mg) |
| -1 | 0 | 4 : 5 : 0.5 | 90 |
| 0 | 3 | 5 : 4 : 0.5 | 100 |
| 1 | 6 | 6 : 3 : 0.5 | 110 |

**Table S2**  Observed responses of Box–Behnken experimental design.

| No. | X1 | X2 | X3 | R ( h ) |
| --- | --- | --- | --- | --- |
| 1 | -1 | -1 | 0 | 3.33 |
| 2 | 1 | -1 | 0 | 6.83 |
| 3 | -1 | 1 | 0 | 4.75 |
| 4 | 1 | 1 | 0 | 7.83 |
| 5 | -1 | 0 | -1 | 3.58 |
| 6 | 1 | 0 | -1 | 7.08 |
| 7 | -1 | 0 | 1 | 3.83 |
| 8 | 1 | 0 | 1 | 7.50 |
| 9 | 0 | -1 | -1 | 6.08 |
| 10 | 0 | 1 | -1 | 6.50 |
| 11 | 0 | -1 | 1 | 6.33 |
| 12 | 0 | 1 | 1 | 6.75 |
| 13 | 0 | 0 | 0 | 5.67 |
| 14 | 0 | 0 | 0 | 5.75 |
| 15 | 0 | 0 | 0 | 5.75 |
| 16 | 0 | 0 | 0 | 5.58 |
| 17 | 0 | 0 | 0 | 5.67 |

**Table S3** Accelerated stability test of IN capsules.

| Time (month) | Appearance | Weight increment (%) | IN Content (mg) | D15*(%) |
| --- | --- | --- | --- | --- |
| 0 | yellow capsule | 0 | 25.05 ± 0.02 | 87.79 ± 0.68 |
| 1 | no clear change | 0.62 ± 0.81 | 25.01 ± 0.04 | 86.92 ± 0.73 |
| 2 | no clear change | 1.03 ± 1.21 | 24.98 ± 0.12 | 86.27 ± 1.36 |
| 3 | no clear change | 1.85 ± 1.38 | 24.95 ± 0.09 | 85.81 ± 2.31 |
| 6 | no clear change | 2.91 ± 0.75 | 24.89 ± 0.13 | 84.15 ± 1.83 |

*D15 represents the release percentage of IN from IN capsules at 15 minutes.
